# Supplementary material
Source: Springer Nature journal article supplement (https://www.springermedizin.de/resource/supplementary/12885_2013_4284_MOESM6_ESM.pdf/9466820)

**SATDIP mean scores by primary localization**

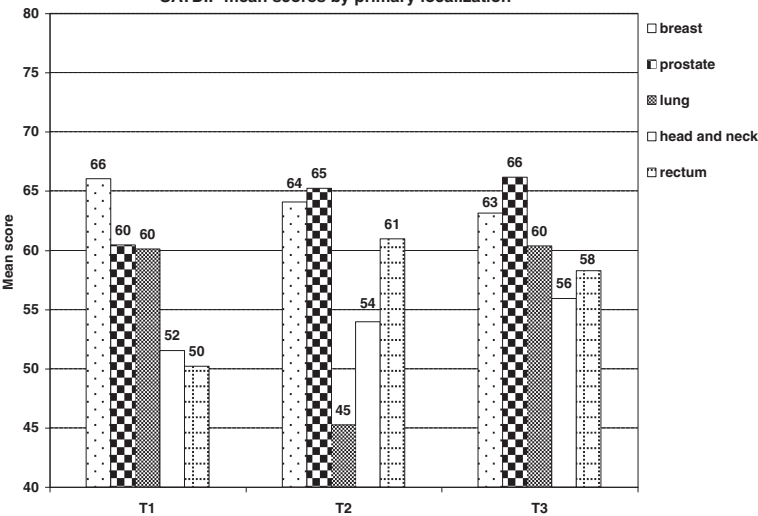

**SATPE mean scores by primary localization**

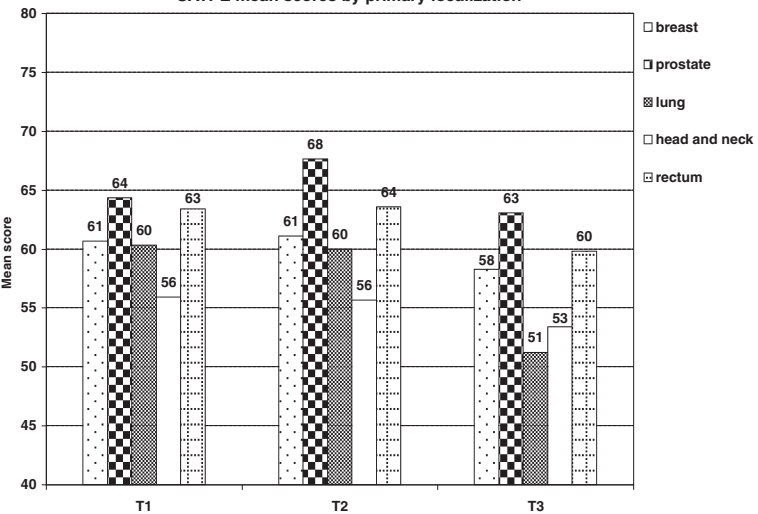

Supplement: MOESM6 [file 9466820]
